# Supplementary material
Source: PubMed Central journal article supplement (PMC2785182)
Supplement: supp_M109.021659_jbc.M109.021659-1.pdf [file supp_M109.021659_jbc.M109.021659-1.pdf]

## Supplemental Data Hadian et al.

### Supplemental Figure S1

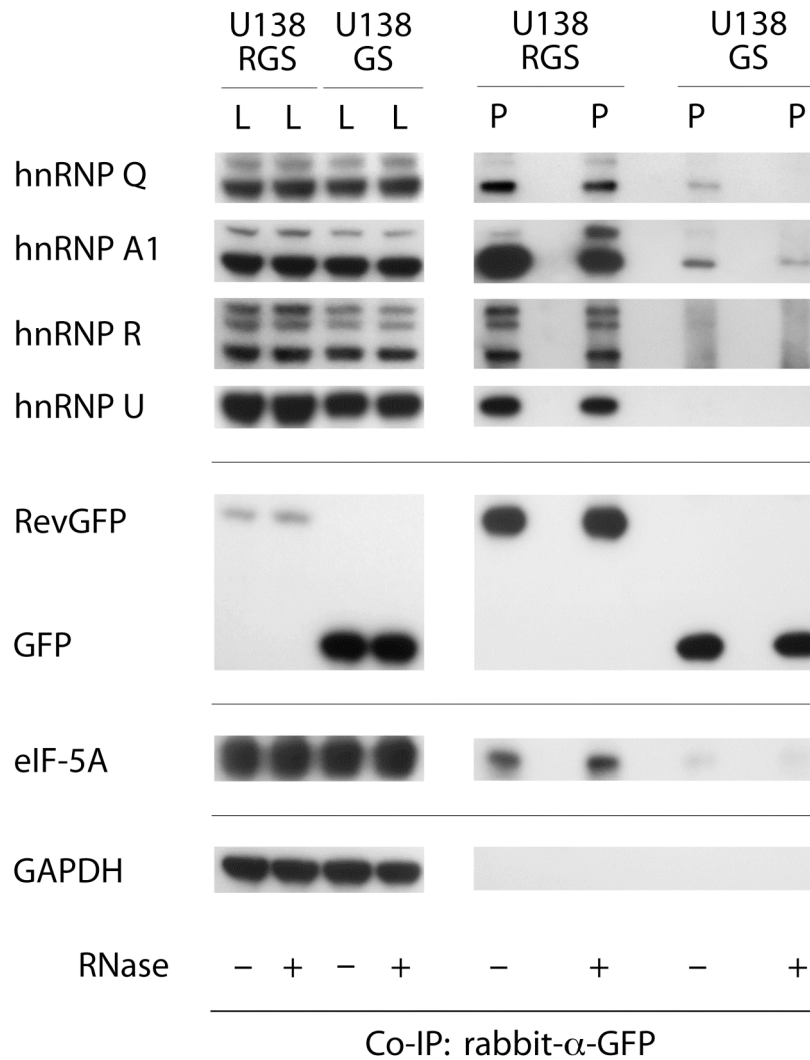

#### Supplemental Figure S1. Co-immunoprecipitation analysis with RNase A treated cell lysates demonstrates RNA-independent interaction of Rev with hnRNP Q, A1, R and U.

Lysates (L) were generated from U138MG cells stably expressing RevGFP-*Strep*TagII (RGS) or GFP-*Strep*TagII (GS). Co-immunoprecipitation assays were performed with cell lysates preincubated with 200  $\mu$ g/ml RNase A (as described in (1)) and a rabbit-anti-GFP antibody. All investigated proteins were detected in all cell lysates before (-) and after (+) RNase treatment. Analysis of the precipitates (P) from RNase A treated as well as untreated lysates revealed co-precipitation of hnRNP Q, A1, R and U with RevGFP-*Strep*TagII (RGS), but hardly with GFP-*Strep*TagII (GS). RGS and GS were efficiently precipitated. EIF-5A served as a control for a known Rev-interactor and GAPDH as a control for a non-interacting protein.

## Supplemental Figure S2

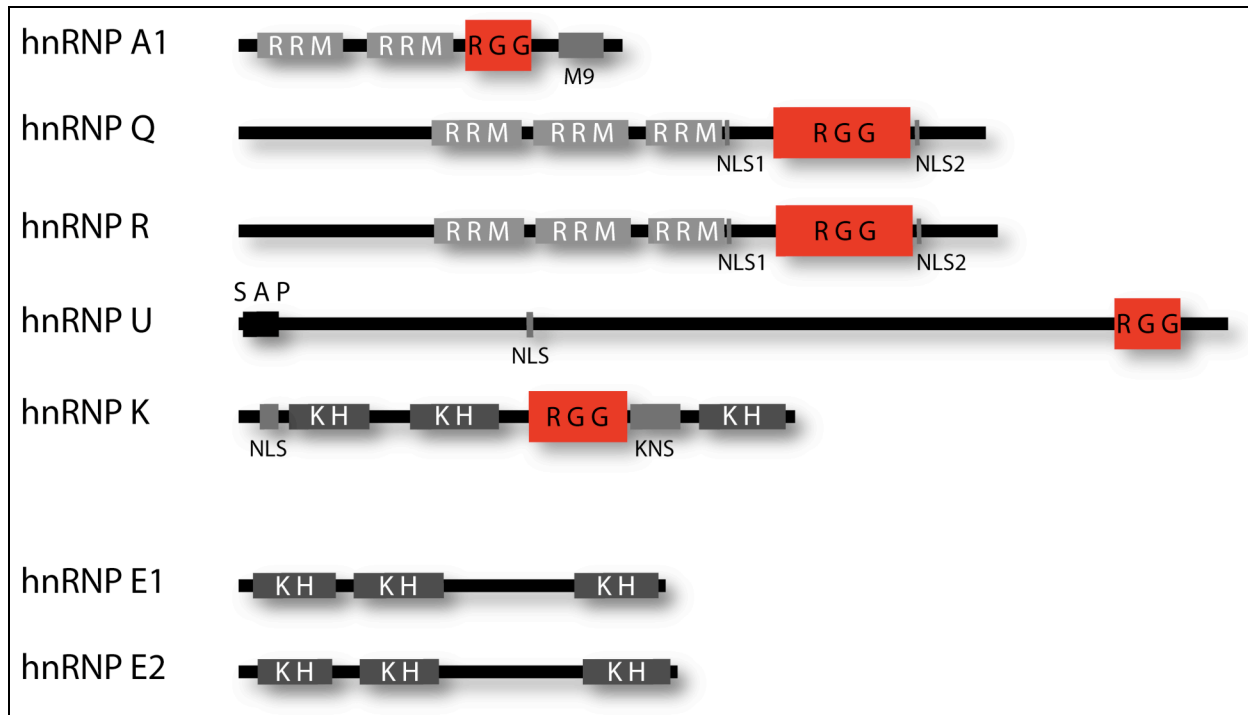

### Supplemental Figure S2. Protein domains of hnRNP A1, Q, R, U, K, E1 and E2.

KH = K-homology domain; KNS = K nuclear shuttling domain; NLS = nuclear localization domain; M9 = shuttle sequence; RGG = Arginine-Glycin-rich motif; RRM = RNA recognition motif; SAP = SAFA/B-Acinus-PIAS DNA binding domain

## Supplemental Figure S3

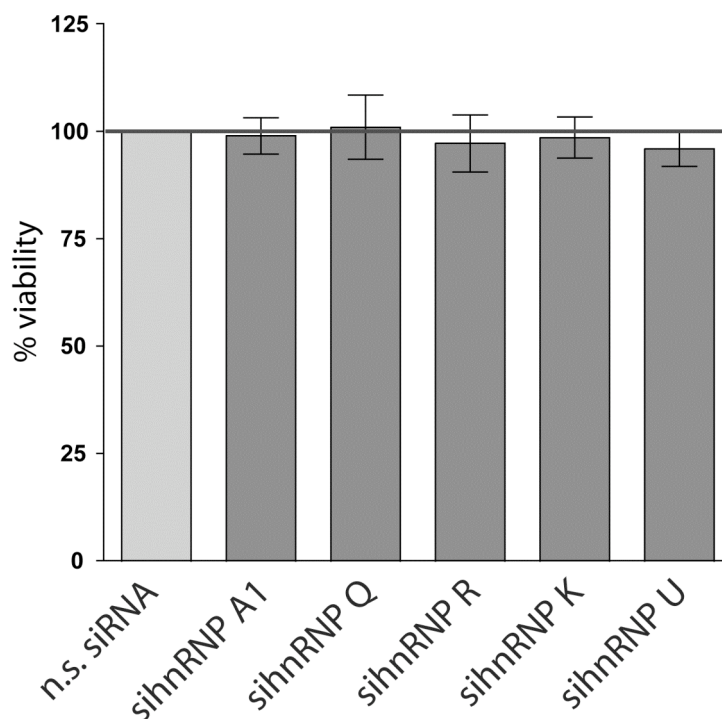

### Supplemental Figure S3. Measurement of cytotoxic effects of the investigated siRNAs.

All siRNAs were transfected in TH4-7-5 cells and cytotoxicity of the siRNAs were investigated using the MTT test. The non-silencing control was set to 100% viability and all other siRNAs were referred to this control. Results from the MTT test demonstrate that the investigated siRNAs had no effects on cell viability.

### Supplemental Figure S4 (next page). Conservation of Rev AA 1-14 amongst HIV-1 clades of the M-group.

*A.* The diagram shows the conservation profile of Rev protein sequences (amino acid similarities) amongst HIV-1 clades of the M-group. Conservation was determined from the sequences of the M-group taken from the HIV database (<http://www.hiv.lanl.gov/content/index>). 38 clade representative protein sequences were used. The alignment was carried out using DiAlign (Genomatix software, Munich), and the maximum similarity measure was set to 15. The sequence of the Rev protein used in this study is indicated below the conservation profile as reference. The N-terminal region of Rev is highlighted. *B.* Conservation of individual amino acid positions in the Rev AA 1-14 region.

# Supplemental Figure S4

**A**

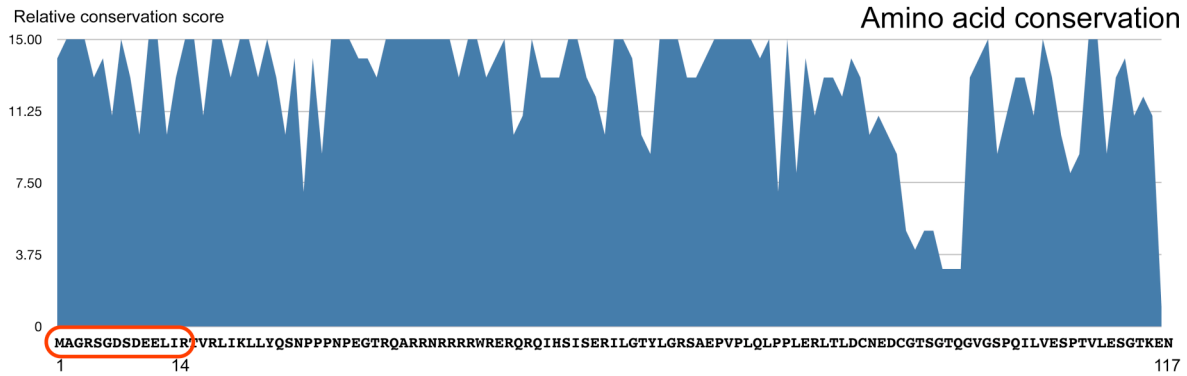

**B**

| Clade | Amio acid (AA)          | 1  | 2   | 3   | 4   | 5  | 6  | 7  | 8  | 9   | 10 | 11  | 12  | 13  | 14 |
|-------|-------------------------|----|-----|-----|-----|----|----|----|----|-----|----|-----|-----|-----|----|
|       | Charge conservation (%) | 97 | 100 | 100 | 100 | 92 | 95 | 84 | 92 | 100 | 87 | 68  | 100 | 100 | 63 |
|       | Most conserved AA       | M  | A   | G   | R   | S  | G  | D  | S  | D   | E  | D/E | L   | L/I | R  |
|       | %                       | 97 | 100 | 100 | 100 | 92 | 95 | 84 | 55 | 97  | 82 | 68  | 100 | 97  | 34 |
| A1    | Ref.A1.AU.03.PS1055     | M  | A   | G   | R   | S  | G  | D  | S  | D   | E  | E   | L   | L   | K  |
|       | Ref.A1.KE.94.Q23_17     | M  | A   | G   | R   | S  | G  | D  | S  | D   | E  | E   | L   | L   | R  |
|       | Ref.A1.RW.92.92RW008    | M  | A   | G   | R   | S  | G  | D  | S  | D   | E  | D   | L   | L   | R  |
| A2    | Ref.A1.UG.92.92UG037    | M  | A   | G   | R   | S  | G  | N  | P  | D   | E  | E   | L   | L   | R  |
|       | Ref.A2.CD.97.97CDKTB    | M  | A   | G   | R   | S  | G  | D  | P  | D   | E  | D   | L   | L   | R  |
| B     | Ref.A2.CY.94.94CY017    | T  | A   | G   | R   | S  | D  | D  | P  | D   | E  | S   | L   | L   | Q  |
|       | Ref.B.FR.83.HXB2_LAI    | M  | A   | G   | R   | S  | G  | D  | S  | D   | E  | D   | L   | L   | R  |
|       | Ref.B.NL.00.671_00T3    | M  | A   | G   | R   | S  | G  | D  | S  | D   | E  | E   | L   | L   | R  |
| C     | Ref.B.B.TH.90.BK123.AY  | M  | A   | G   | R   | S  | G  | D  | S  | D   | E  | E   | L   | L   | R  |
|       | Ref.B.US.98.1058_11     | M  | A   | G   | R   | S  | G  | D  | R  | D   | E  | E   | L   | L   | Q  |
|       | Ref.C.BR.92.BR025_d     | M  | A   | G   | R   | S  | G  | D  | S  | D   | E  | A   | L   | L   | Q  |
| D     | Ref.C.ET.86.ETH2220.    | M  | A   | G   | R   | S  | G  | D  | S  | D   | E  | E   | L   | L   | K  |
|       | Ref.C.IN.95.95IN2106    | M  | A   | G   | R   | S  | G  | D  | S  | D   | E  | A   | L   | L   | K  |
|       | Ref.C.ZA.04.SK164B1.    | M  | A   | G   | R   | S  | G  | D  | S  | D   | E  | A   | L   | L   | Q  |
| F1    | Ref.D.CD.83.ELI.K034    | M  | A   | G   | R   | S  | G  | D  | S  | D   | E  | D   | L   | L   | K  |
|       | Ref.D.CM.01.01CM_441    | M  | A   | G   | R   | R  | E  | D  | S  | D   | E  | D   | L   | L   | K  |
|       | Ref.D.TZ.01.A280.AY2    | M  | A   | G   | R   | S  | G  | D  | S  | D   | E  | E   | L   | L   | R  |
| F2    | Ref.D.UG.94.94UG114     | M  | A   | G   | R   | S  | G  | D  | R  | D   | E  | E   | L   | L   | Q  |
|       | Ref.F1.BE.93.VI850.A    | M  | A   | G   | R   | S  | G  | D  | S  | D   | T  | E   | L   | L   | K  |
|       | Ref.F1.BR.93.93BR020    | M  | A   | G   | R   | S  | G  | D  | S  | D   | Q  | E   | L   | L   | K  |
| G     | Ref.F1.F1.93.FIN9363    | M  | A   | G   | R   | S  | G  | D  | S  | D   | T  | E   | L   | L   | K  |
|       | Ref.F1.FR.96.MP411.A    | M  | A   | G   | R   | S  | G  | D  | N  | D   | E  | E   | L   | L   | R  |
|       | Ref.F2.CM.02.02CM_00    | M  | A   | G   | R   | S  | G  | D  | S  | D   | E  | A   | L   | L   | T  |
| H     | Ref.F2.CM.95.MP255.A    | M  | A   | G   | R   | S  | G  | D  | S  | D   | E  | D   | L   | L   | K  |
|       | Ref.F2.CM.95.MP257A.A   | M  | A   | G   | R   | S  | G  | D  | R  | D   | E  | E   | L   | L   | K  |
|       | Ref.F2.CM.97.CM53657    | M  | A   | G   | R   | S  | G  | D  | S  | D   | E  | E   | L   | L   | K  |
| J     | Ref.G.BE.96.DRCBL.AF    | M  | A   | G   | R   | S  | G  | S  | T  | D   | E  | E   | L   | L   | T  |
|       | Ref.G.KE.93.HH8793_1    | M  | A   | G   | R   | S  | G  | S  | T  | D   | E  | D   | L   | L   | R  |
|       | Ref.G.NG.92.92NG083     | M  | A   | G   | R   | S  | G  | D  | P  | D   | E  | D   | L   | L   | R  |
| K     | Ref.G.PT.x.PT2695.AY    | M  | A   | G   | R   | S  | G  | S  | T  | D   | E  | D   | L   | L   | R  |
|       | Ref.H.BE.93.VI991.AF    | M  | A   | G   | R   | S  | G  | D  | N  | D   | E  | G   | L   | L   | R  |
|       | Ref.H.BE.93.VI997.AF    | M  | A   | G   | R   | S  | G  | A  | G  | D   | E  | Q   | L   | P   | Q  |
| L     | Ref.H.CF.90.056.AF00    | M  | A   | G   | R   | S  | G  | A  | S  | D   | T  | E   | L   | L   | Q  |
|       | Ref.J.CD.97.J_97DC_K    | M  | A   | G   | R   | S  | G  | D  | S  | D   | E  | Q   | L   | L   | L  |
|       | Ref.J.SE.93.SE7887.A    | M  | A   | G   | R   | S  | G  | D  | S  | D   | D  | Q   | L   | L   | L  |
| M     | Ref.J.SE.94.SE7022.A    | M  | A   | G   | R   | S  | G  | D  | N  | D   | Q  | Q   | L   | L   | A  |
|       | Ref.K.CD.97.WQT11C      | M  | A   | G   | R   | R  | G  | D  | S  | E   | Q  | Q   | L   | L   | T  |
|       | Ref.K.CM.96.MP535.AJ    | M  | A   | G   | R   | R  | G  | D  | P  | D   | E  | Q   | L   | L   | T  |

## Supplemental Table

### Full designations of GO-categories indicated in Figure 5

| Short designation in Figure 5    | GO-category designation                                                                                                               |
|----------------------------------|---------------------------------------------------------------------------------------------------------------------------------------|
| RNA processing/splicing          | mRNA processing / metabolic process                                                                                                   |
|                                  | mRNA metabolic process / RNA processing / cellular component organization and biogenesis / interspecies interaction between organisms |
| Nucleobase metabolism            | nucleobase, nucleoside, nucleotide and nucleic acid metabolic process                                                                 |
|                                  | nucleobase, nucleoside, nucleotide and nucleic acid metabolic process, biopolymer metabolic process                                   |
| Translation                      | translational initiation                                                                                                              |
| DNA repair                       | DNA repair                                                                                                                            |
| DNA metabolism                   | regulation of DNA metabolic process                                                                                                   |
|                                  | positive regulation of DNA metabolic process                                                                                          |
| TF activity regulation           | positive regulation of transcription factor activity                                                                                  |
| Cytokine production/signaling    | cytokine production/secretion/ regulation of secretion                                                                                |
|                                  | cytokine and chemokine mediated signaling pathway                                                                                     |
| Defense response                 | defense response                                                                                                                      |
| Negative regulation of apoptosis | negative regulation of cell death                                                                                                     |
| Cell cycle arrest                | cell cycle arrest                                                                                                                     |
| Protein kinase cascades          | protein kinase cascade / post-translational protein modification / protein amino acid phosphorylation                                 |
| Oxygen metabolic process         | oxygen and reactive oxygen species metabolic process                                                                                  |
| Gas transport                    | gas transport                                                                                                                         |
| Neg. regulation of development   | negative regulation of developmental process                                                                                          |
| Interspecies interactions        | interspecies interaction between organisms                                                                                            |

## Supplemental Reference

1. Huang, Y., Gattoni, R., Stevenin, J., and Steitz, J. A. (2003) *Mol Cell* **11**(3), 837-843
